# Supplementary material for: Point-of-Care Method T2Bacteria®Panel Enables a More Sensitive and Rapid Diagnosis of Bacterial Blood Stream Infections and a Shorter Time until Targeted Therapy than Blood Culture
Source: MDPI journal article supplement (doi:10.3390/microorganisms12050967), 2024-05-11
Supplement: s1 [file s1]

## SUPPLEMENT S1

### *INCLUSION CRITERIA*

1. Patient showed signs of systemic infection (meeting at least two criteria; one in each section):

- Temperature  $\geq 38^{\circ}\text{C}$

and

- Heart Rate  $> 90/\text{min}$
- Systolic Blood Pressure  $< 100\text{mmHg}$
- Respiratory Rate  $\geq 22/\text{min}$
- GCS $<15$

AND

2. Patients showed bacteria specific clinical signs/symptoms of infection with an ESKAPE pathogen (at least one criterion):

- positive urine test strip (Leukocyturia)
- acute bacterial skin and skin structure infections (ABSSSI)
- signs of abscesses in imaging procedure
- acute backpain without trauma and clinical suspected spondylodiscitis
- recent intravenous drug abuse
- endocarditis
- presence of intravascular devices
- presence of peritoneal dialysis
- previous evidence of colonization with ESKAPE organisms
- intraabdominal infection

### *EXCLUSION CRITERIA*

- younger than 18 years
- presence of pneumonia (including clinical suspicion of pneumonia)
- presence of meningitis (including clinical suspicion of meningitis)
- presence ears, nose and throat (ENT) infection (including clinical suspicion of ENT infection)
- presence of or suspicion of colitis
- presence of Influenza or other viral disease explaining the symptoms
- persons who are incapable of giving consent

## SUPPLEMENT S2

*Defined targeted therapy depending on the found pathogen.*

| Pathogen                | Targeted therapy                                                | Targeted therapy if penicillin allergy exists |
|-------------------------|-----------------------------------------------------------------|-----------------------------------------------|
| Enterococcus faecium    | Linezolid, Vancomycin, Daptomycin                               |                                               |
| Staphylococcus aureus   | Isoxazolympenicillin, Cephalosporine 1 <sup>st</sup> Generation |                                               |
| Klebsiella pneumoniae   | Cephalosporine 3 <sup>rd</sup> Generation,                      | Ciprofloxacin/Levofloxacin                    |
| Acinetobacter baumannii | Meropenem                                                       | -                                             |
| Pseudomonas aeruginosa  | Piperacillin/Tazobactam, Ceftazidim, Cefepime                   | Aztreonam                                     |
| Escherichia coli        | Cephalosporine 2 <sup>nd</sup> or 3 <sup>rd</sup> Generation    | -                                             |
